# Supplementary material
Source: publisher figshare collection journal article supplement (https://gsajournals.figshare.com/ndownloader/files/23992556)
Supplement: Supplementary file 1 [file 23992556]

## File S1: Sample code for linear mixed models

The linear mixed models employed were all variations on the following general model:

$$Y = X\beta + \sum_{j=1}^5 Z_j\gamma_j + \epsilon$$

where:

$Y$  is an  $n \times 1$  vector of responses.

$X$  is a fixed effects design matrix which can accommodate sex and treatment (and the interaction thereof), the pre-treatment phenotype value, as well as an intercept.

$\beta$  is a vector of fixed-effect parameters associated with  $X$ .

$Z_j$  is an  $n \times q_j$  random effect design matrix.

$\gamma_j$  is the  $q_j \times 1$  random effect vector associated with the  $j$ th random effect.

Our models of interest include up to five random effects: a batch effect ( $\gamma_1$ ), parental strain effect ( $\gamma_2$ ), a parental strain-by-treatment interaction effect ( $\gamma_3$ ), a sex-by-strain effect ( $\gamma_4$ ), and sex-by-strain-by-treatment interaction effect ( $\gamma_5$ ). The associated random design matrices are constructed as follows:

- Each row of  $Z_1$  has a single nonzero element, which is a 1 in the column corresponding to mouse's batch.
- Each row of  $Z_2$  has two nonzero elements, which are 1's in the columns corresponding to the parental strains.
- $Z_3$  is constructed from  $Z_2$  by switching the 1's to -1's for mice that are treated with placebo.
- $Z_4$  and  $Z_5$  are constructed from  $Z_2$  and  $Z_3$ , respectively, by switching the signs of the two elements in each row corresponding to female mice.

We assume that the  $\gamma_j$ 's are mutually independent and  $\gamma_j \sim N(0, \sigma_j^2 I_{q_j \times q_j})$ . Further, the error term  $\epsilon \sim N(0, \sigma_\epsilon^2 * I_{n \times n})$ , independent of the random effects ( $n$  denotes the total sample size for the phenotype being studied).

All our models were fit with the SAS code below, where &depvar and &indvars are macro variables that contain the dependent and relevant independent variables, respectively, for the phenotype being modeled, and &numbatch and &numparent correspond to the number of batches and number of parental strains represented in the dataset.

```
proc mixed data=dataset;  
  model &depvar. = &indvars. / s;  
  random batch1-batch&numbatch. / type = TOEP(1);  
  random addint1-addint&numparent. / type = TOEP(1);  
  random addtmt1-addtmt&numparent. / type = TOEP(1);  
  random addsex1-addsex&numparent. / type = TOEP(1);  
  random addsextmt1-addsextmt&numparent. / type = TOEP(1);  
run;
```
